# Supplementary material for: Reporting of 3Rs Approaches in Preclinical Animal Experimental Studies—A Nationwide Study
Source: MDPI journal article supplement (doi:10.3390/ani13193005), 2023-09-23
Supplement: s1 [file s1]

**Table S2.** Criteria for the assessment of reporting compliance with legislation on animal experimentation and the 3Rs<sup>1</sup> - examples.

| <b>Compliance with legislation on animal experimentation</b> |                                                                                               |                                                                                                                            |                                                                                                                                                                                                                                          |
|--------------------------------------------------------------|-----------------------------------------------------------------------------------------------|----------------------------------------------------------------------------------------------------------------------------|------------------------------------------------------------------------------------------------------------------------------------------------------------------------------------------------------------------------------------------|
| Criteria for a judgement of "Yes" (Reported)                 | Reported that the study is conducted in compliance with legislation on animal experimentation | Compliance with legislation on animal experimentation mentioned                                                            | Quote: "Experiments were approved by the Danish Animal Experiments Inspectorate and conducted in accordance to the ethical legislation for the care and use of experimental animals."                                                    |
| <b>The 3Rs</b>                                               |                                                                                               |                                                                                                                            |                                                                                                                                                                                                                                          |
| Criteria for a judgement of "Yes" (Reported)                 | Reported with no specific method to implement the 3Rs                                         | Reported 3R sentences of replacement, reduction, and refinement with no method to implement one or more of the 3Rs         | "Quote: "All efforts were made to minimize both the suffering and the number of animals."                                                                                                                                                |
|                                                              | Reported with a specific method to implement the 3Rs                                          | Reported 3R sentences of replacement, reduction, and refinement with a specific method to implement one or more of the 3Rs | Quote: "Following the principles of replacement, reduction, and refinement for animal studies, we used pigs that were also part of a previously published study."                                                                        |
|                                                              | Reported to be in compliance with the 3Rs and/or the ARRIVE guidelines                        | Compliance with the 3Rs and/or the ARRIVE guidelines mentioned                                                             | Quote: "The experimental protocol was designed taking into account the Russel and Burch 3R's principle. Quote: "All experiments were reported in compliance with the ARRIVE guidelines (Animal Research: Reporting in Vivo Experiments)" |
| <b>Replacement</b>                                           |                                                                                               |                                                                                                                            |                                                                                                                                                                                                                                          |
| Criteria for a judgement of "Yes" (Reported)                 | Reported without a specific method to implement replacement                                   | Replacement mentioned with no specific method to implement replacement                                                     | Quote: None mentioned                                                                                                                                                                                                                    |
|                                                              | Reported with a specific method to implement replacement                                      | Replacement mentioned with a specific method to implement replacement                                                      | Quote: None mentioned                                                                                                                                                                                                                    |
| <b>Reduction</b>                                             |                                                                                               |                                                                                                                            |                                                                                                                                                                                                                                          |
| Criteria for a judgement of "Yes" (Reported)                 | Reported <i>without</i> a specific method to implement reduction                              | Reduction mentioned with no specific method to implement reduction                                                         | Quote: "Every effort was made to minimize the number of mice used..."                                                                                                                                                                    |
|                                                              | Reported <i>with</i> a specific method to implement reduction                                 | Reduction mentioned with a specific method to implement reduction                                                          | Quote: "...to minimize the number of mice used for experiments, we combined the cytokine assay with a glymphatic assay for clearance."                                                                                                   |

---

**Refinement**

|                                              |                                                            |                                                                      |                                                                       |
|----------------------------------------------|------------------------------------------------------------|----------------------------------------------------------------------|-----------------------------------------------------------------------|
| Criteria for a judgement of “Yes” (Reported) | Reported without a specific method to implement refinement | Refinement mentioned with no specific method to implement refinement | Quote: “ <i>All efforts were made to minimize animal suffering.</i> ” |
|                                              | Reported with a specific method to implement refinement    | Refinement mentioned with a specific method to implement refinement  | Quote: “ <i>To minimize stress, animals were habituated...</i> ”      |

<sup>1</sup> Modified from Cochrane Handbook for Systematic Reviews of Interventions, version 5.2.0 (updated June 2017), Cochrane, 2017
